# Supplementary material
Source: PubMed Central journal article supplement (PMC2908304)

# **Molecular Imaging of Matrix Metalloproteinase Activation to Predict Murine Aneurysm Expansion in vivo**

## **Supplemental Figure Legends**

Supplemental Figure 1. Representative immunofluorescent staining of the control right and CaCl<sub>2</sub>-exposed left carotid arteries for endothelial cells (CD31), VSMCs ( $\alpha$ -actin) and macrophages (F4/80) at 4 weeks after surgery demonstrating the presence of a large number of macrophages (arrows) in the aneurysm. Nuclei are detected by DAPI in blue. Scale bars: 100  $\mu$ m for endothelial cell and VSMC, and 10  $\mu$ m for macrophage panels.

Supplemental Figure 2. Representative examples of MMP-7 and MMP-12 immunofluorescent staining (in red) of aneurismal carotid arteries at 4 weeks. Nuclei are detected by DAPI in blue. Scale bar: 50  $\mu$ m.

Supplemental Figure 3. GAPDH-normalized relative MMP mRNA expression detected by RT-PCR in control right and aneurysmal left carotid artery at 2, 4 and 8 weeks (wk) after CaCl<sub>2</sub> application. n=5-7, \* p<0.05, \*\* p<0.01, \*\*\* p<0.001.

Supplemental Figure 4. Examples of carotid artery and aortic arch RP782 autoradiography, in the absence (left) or presence (right) of pretreatment with 50-

fold excess non-labeled precursor at 4 weeks, demonstrating tracer uptake specificity. The figure is representative of three sets of mice. Scale bar: 4 mm.

Supplemental Figure 5. Ex vivo RP782 binding to aneurysmal carotids in the absence or presence of a broad-spectrum MMP inhibitor, 1,10-phenanthroline, quantified by gamma-well counting. n=6, \* p<0.05.

Supplemental Figure 1

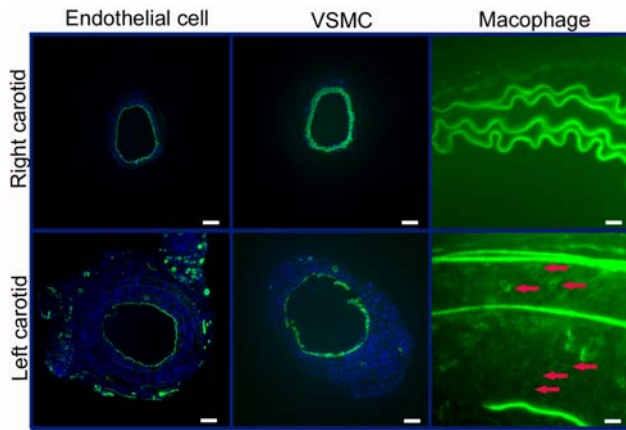

Supplemental Figure 2

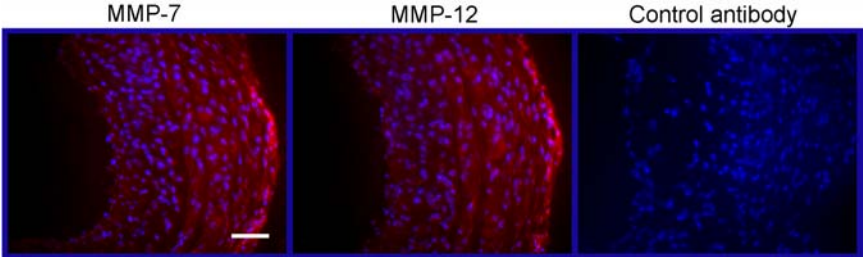

### Supplemental Figure 3

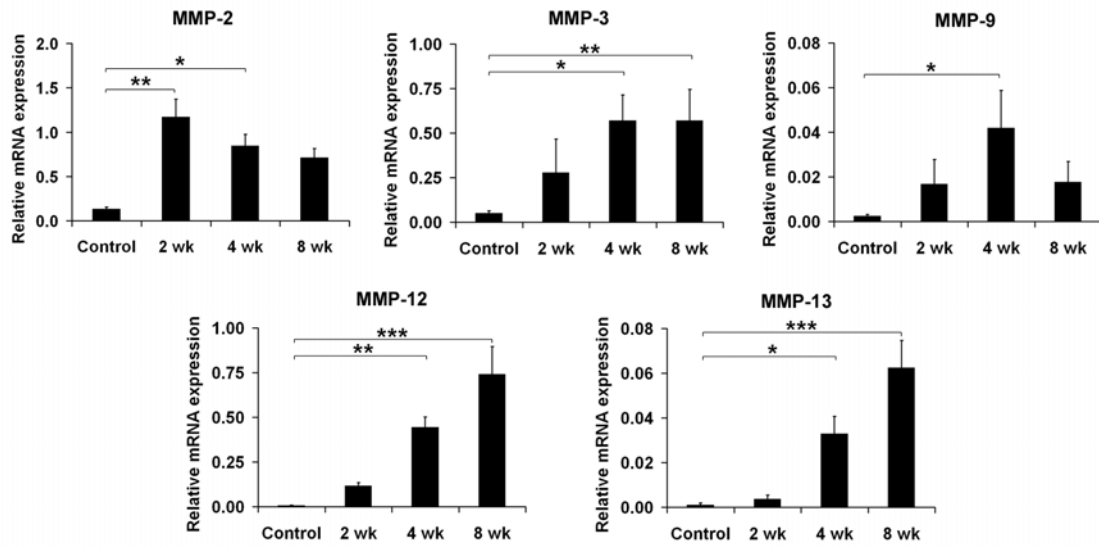

Supplemental Figure 4

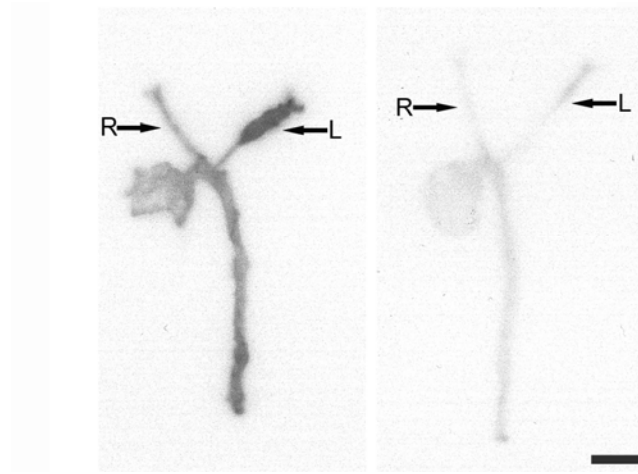

Supplemental Figure 5

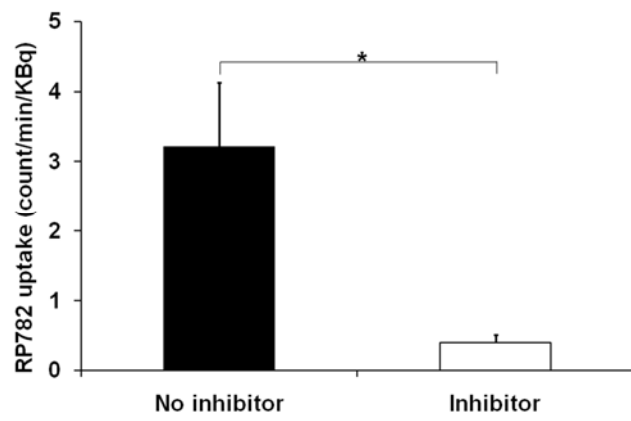

Supplement: NIHMS201166-supplement-supplementary_data.pdf [file NIHMS201166-supplement-supplementary_data.pdf]
